# Supplementary material for: Model-based analysis of response and resistance factors of cetuximab treatment in gastric cancer cell lines
Source: PubMed Central journal article supplement (PMC7067490; doi:10.1371/journal.pcbi.1007147), 2020-03-02
Supplement: pcbi.1007147.s014.pdf [file pcbi.1007147.s014.pdf]

| Module                                                                                       | Reaction                                                                                                                                             | Description                                 |
|----------------------------------------------------------------------------------------------|------------------------------------------------------------------------------------------------------------------------------------------------------|---------------------------------------------|
| EGFR<br>turnover                                                                             | R10: $(\text{pEGFR:EGF})_2 \rightarrow (\text{pEGFR:EGF})_{2,\text{endocytic vesicle}}$                                                              | Endocytosis of pEGFR                        |
|                                                                                              | R14: $(\text{pEGFR:EGF})_{2,\text{endocytic vesicle}} \rightarrow \emptyset$                                                                         | Lysosomal degradation of endocytosed pEGFR  |
|                                                                                              | R2: $\text{EGFR} \rightarrow \emptyset$                                                                                                              | Basal membrane turnover                     |
|                                                                                              | R5: $\text{EGFR:CET} \rightarrow \emptyset$                                                                                                          |                                             |
|                                                                                              | R12: $\text{EGFR:EGF} \rightarrow \emptyset$                                                                                                         |                                             |
|                                                                                              | R13: $(\text{EGFR:EGF})_2 \rightarrow \emptyset$                                                                                                     |                                             |
| R11: $(\text{pEGFR:EGF})_{2,\text{endocytic vesicle}} \rightarrow \text{EGFR} + \text{EGFR}$ | EGFR recycling endosomes                                                                                                                             |                                             |
| RAS-MAPK<br>signaling                                                                        | R39: $\text{RAS-GDP} \rightarrow \text{RAS-GTP}$                                                                                                     | Basal activation of RAS                     |
|                                                                                              | R40: $\text{RAS-GDP} + (\text{pEGFR:EGF})_2 \rightarrow \text{RAS-GTP} + (\text{pEGFR:EGF})_2$                                                       | EGFR dependent activation of RAS            |
|                                                                                              | R41: $\text{RAS-GDP} + (\text{pEGFR:EGF})_{2,\text{endocytic vesicle}} \rightarrow \text{RAS-GTP} + (\text{pEGFR:EGF})_{2,\text{endocytic vesicle}}$ |                                             |
|                                                                                              | R46: $\text{RAS-GTP} \rightarrow \text{RAS-GDP}$                                                                                                     | Basal GTPase activity of RAS                |
|                                                                                              | R47: $\text{ERK} + \text{RAS-GTP} \rightarrow \text{pERK} + \text{RAS-GDP}$                                                                          | RAS dependent activation of MAPK            |
| PI3K-AKT<br>signaling                                                                        | R65: $\text{AKT} + \text{pPI3K} \rightarrow \text{pAKT} + \text{pPI3K}$                                                                              | PI3K and MPI3K dependent activation of AKT  |
|                                                                                              | R66: $\text{AKT} + \text{pMPI3K} \rightarrow \text{pAKT} + \text{pMPI3K}$                                                                            |                                             |
|                                                                                              | R67: $\text{pAKT} \rightarrow \text{AKT}$                                                                                                            | Basal dephosphorylation of pAKT             |
|                                                                                              | R56: $\text{pPI3K} \rightarrow \text{PI3K}$                                                                                                          | Basal dephosphorylation of pPI3K and pMPI3K |
|                                                                                              | R64: $\text{pMPI3K} \rightarrow \text{MPI3K}$                                                                                                        |                                             |
