# Supplementary material for: Model-based analysis of response and resistance factors of cetuximab treatment in gastric cancer cell lines
Source: PubMed Central journal article supplement (PMC7067490; doi:10.1371/journal.pcbi.1007147), 2020-03-02
Supplement: pcbi.1007147.s015.pdf [file pcbi.1007147.s015.pdf]

| Reaction                                                                                                                                                                                                                                                      | Value                      | Publication                                    |
|---------------------------------------------------------------------------------------------------------------------------------------------------------------------------------------------------------------------------------------------------------------|----------------------------|------------------------------------------------|
| R6, R7: $\text{EGFR} + \text{EGF} \rightleftharpoons \text{EGFR:EGF}$                                                                                                                                                                                         | $\log_{10}(2)$             | Klein et al. [2004], page 1                    |
| R3, R4: $\text{EGFR} + \text{CET} \rightleftharpoons \text{EGFR:CET}$                                                                                                                                                                                         | $\log_{10}(0.39)$          | [Kim and Grothey, 2008], page 2                |
| R10: $(\text{pEGFR:EGF})_2 \rightarrow (\text{pEGFR:EGF})_{2,\text{endocytic vesicle}}$<br>R22: $\text{pMMET}_2 \rightarrow \text{pMMET}_{2,\text{endocytic vesicle}}$<br>R34: $\text{pMMET:pEGFR} \rightarrow \text{pMMET:pEGFR}_{\text{endocytic vesicle}}$ | $\log_{10}(0.25)$          | [Sorkin and Duex, 2010], page 19               |
| R67: $\text{pAKT} \rightarrow \emptyset$                                                                                                                                                                                                                      | $\log_{10}(1.5 \times 60)$ | [Schöberl et al., 2009], kinetic rate $k_f 83$ |
